# Brainprints: identifying individuals from magnetoencephalograms

Shenghao Wu<sup>1,2</sup>, Aaditya Ramdas<sup>2,3</sup>, and Leila Wehbe<sup>1,2,\*</sup>

<sup>1</sup>Neuroscience Institute, Carnegie Mellon University

<sup>2</sup>Machine Learning Department, Carnegie Mellon University

<sup>3</sup>Department of Statistics and Data Science, Carnegie Mellon University

\* correspondence should be addressed to: [lwehbe@cmu.edu](mailto:lwehbe@cmu.edu)

Word count: 5118

Number of figures: 7

Supplementary Figures & Tables: 8

1

## Abstract

2 Magnetoencephalography (MEG) is used to study a wide variety of cognitive  
3 processes. Increasingly, researchers are adopting principles of open science and  
4 releasing their MEG data. While essential for reproducibility, sharing MEG  
5 data has unforeseen privacy risks. Individual differences may make a participant  
6 identifiable from their anonymized recordings. However, our ability to identify  
7 individuals based on these individual differences has not yet been assessed. Here,  
8 we propose interpretable MEG features to characterize individual difference. We  
9 term these features brainprints (brain fingerprints). We show through several  
10 datasets that brainprints accurately identify individuals. Furthermore, we  
11 identify consistent brainprints components that are important for identification.  
12 We study the dependence of identifiability on the amount of data available. We  
13 also relate identifiability to the level of preprocessing and the experimental task.  
14 Our findings reveal specific aspects of individual variability in MEG. They also  
15 raise concerns about unregulated sharing of brain data, even if anonymized.

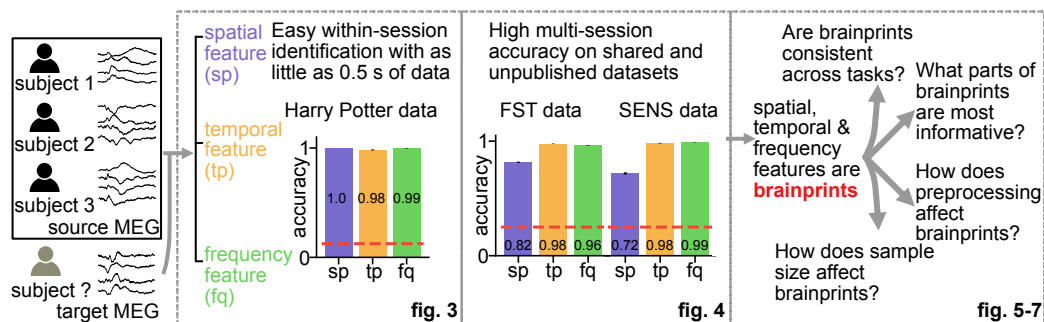

Figure 1: **Graphical abstract.** Identifying which subject a segment of MEG data belongs to is strikingly easy when other data from the same session is available for every subject. We propose three types of interpretable features that can be used to identify individuals across sessions with high accuracy. Identifiability of individuals is influenced by factors such as resting state vs. task state, components of each feature, the sample size and the level of preprocessing. Our results reveal aspects of individual variability in MEG signals and highlight privacy risks associated with MEG data sharing.

## 16 Introduction

17 The open science movement is a result of the increasing awareness of the importance  
18 of sharing data and code to promote scientific reproducibility [1]. Public repositories  
19 enable researchers to share their neuroimaging data (fMRI, EEG, MEG, etc.) while  
20 making sure to censor out individual information [2]. However, data anonymization  
21 does not always preserve privacy [3]. Combining different types of information using  
22 methods such as record linkage approaches [4] may cause serious privacy violations.  
23 This problem is exacerbated when multiple datasets that happen to contain the same  
24 individual are available, which is rather common in neuroimaging (e.g. [5]). Hence  
25 it is natural to ask if anonymized individuals can be identified from neuroimaging  
26 datasets and if so to what degree. Specifically, we ask: do individuals have a *brainprint*,  
27 a brain-activity analog of a fingerprint? If there is evidence for a brainprint, then  
28 researchers may be warned about how easily individual information can be inferred,  
29 and it may cause them (and the field) to act with more caution when publishing  
30 neuroimaging data online. For instance, it may pave the way for the adoption of more  
31 sophisticated data-release mechanisms like differential privacy [6] and homomorphic  
32 encryption [7].

33 Assume there are two multi-individual neuroimaging datasets with overlapping  
34 participants: a "source" dataset and a "target" dataset. The question of interest is:  
35 can we accurately decide which individual in the source dataset corresponds to the  
36 individual in the target set? In other words, is there individual *identifiability* between  
37 the two datasets? The aforementioned question could arise naturally in practice: it  
38 is very common for university labs to recruit their own lab members for preliminary  
39 studies; these are anonymously released with an associated publication. Assume that  
40 one year later, lab member A relocates to city B, and privately volunteers for a study  
41 by a public hospital that tracks the effect of a drug (or some intervention) on patients  
42 in early stages of early-onset Alzheimer's, while collecting MEG data. If this data is  
43 also anonymously released at a future point, brainprints could plausibly be used to  
44 detect a common participant, thus identifying that A has Alzheimer's because only  
45 one member of the lab moved to city B. This would already be a gross unintended  
46 violation of privacy, but one can further imagine that an insurance company uses this  
47 to prove that a condition was pre-existing at the time of the first scan (before the  
48 individual themselves knew), or use it to decide individual-level pricing.

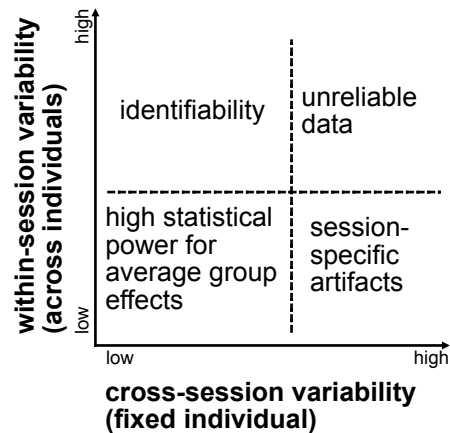

Figure 2: **Individual identifiability is a function of individual and session variability in neuroimaging.** Consider repeating an experiment in multiple sessions for a group of individuals. Cross-session variability refers to the change in the recorded data for the same individual across sessions, while within-session variability refers to differences in a single session’s recorded data across individuals (keeping all other variables, including the stimulus, unchanged). The ideal conditions for the scientific discovery of an effect shared by the group is low within-session and low cross-session variability. However, the combination of low within-session and high cross-session variability indicates an artifact or a confound in the experiment design (e.g., each month, one session is recorded for all individuals and the instrument has a drift over time). High within-session variability paired with low cross-session variability leads to individual identifiability with the individual’s data acting like a stable signature that differentiates them from others. Finally, high within-session and cross-session variability leads to unreliable data.

49 If high individual identifiability exists even if the source and target set were  
50 recorded in separate sessions for each individual, there might be essential differences  
51 in the patterns of the data among individuals which is preserved across scanning  
52 sessions. Namely, individual identifiability might be related to variability in brain  
53 structure or function (or other individual characteristics such as head size). In multi-  
54 individual, multi-session neuroimaging data, there exists “within-session” variability  
55 across individuals in the same session and “cross-session” variability of the same  
56 individual cross sessions [8]. For simplicity, consider the four scenarios in Figure 2.  
57 Low variability in both within-session (individuals are similar) and cross-session  
58 (an individual’s data is consistent across session) is likely to promote statistical  
59 power for detecting average group effects with fixed sample size, thereby facilitating

60 reproducibility [9, 10]. High cross-session and low within-session variability (e.g.  
61 individual 1’s data in session 1 is very different from their data for session 2, but  
62 somehow very similar to individual 2’s data in session 1) may indicate session-specific  
63 artifacts (e.g. the scanner was faulty during the recording of session 1 for all individuals).  
64 High cross- and within-session variability makes data unreliable. Finally, high within-  
65 session (individuals are different from each other) and low cross-session variability  
66 (individuals are similar to themselves) leads to individual identifiability. Individual  
67 identifiability in turn indicates *consistent* individual differences, which in themselves  
68 are an important topic of scientific enquiry [8, 11]. Understanding sources of consistent  
69 variability can help learn the underpinnings of disease or more generally to map the  
70 relationship of brain structure and activity to individual behavioral characteristics.

71 Similar individual identification problems have been studied using EEG and fMRI  
72 for the purpose of biometric authentication and to investigate individual differences  
73 [12, 13, 14, 15, 16, 17, 18]. The term ‘brainprint’ has also been previously used to  
74 represent brain-specific information, such as morphology and event related potential  
75 biometrics [19, 20, 21], that can be used to identify individuals. Individual identification  
76 with MEG data, however, has not been fully explored. Due to availability of MEG  
77 datasets, only single-trial MEG data has been studied for person identification [22].  
78 Other MEG studies focusing on variability of individual data [8, 11] may not make  
79 connections with individual identifiability.

80 In this paper, we argue that individuals can be easily identified with MEG data.  
81 We measure identifiability as identification accuracy with three interpretable MEG  
82 features on multiple public and private MEG datasets. We show that identifiability  
83 is not a product of environmental artifacts and specific features have a consistent  
84 performance between task and resting state data. We further dissect the contribution  
85 of each features into sub-features to understand what may be leading to the high  
86 identifiability. Factors such as the amount of data and level of preprocessing are also  
87 shown to have influence on identifiability. Our analysis not only confirms the worrisome  
88 potential of privacy being compromised by released MEG data via extracting simple  
89 features but also leverage the interpretability of the features to explain the underlying  
90 mechanism for the high identifiability, thereby relating it to individual variability.

## 91 Results

92 We organize our results from simple datasets to more complicated ones in our context,  
93 to a closer investigation of the methodology itself. We first use machine learning tools  
94 as well as interpretable features to show that identification is easy when the MEG  
95 sessions were collected on a single visit. We then show that the proposed features  
96 also achieve high accuracy on datasets of multiple visits to the scanner, and some  
97 feature is even consistent on datasets between different tasks. We finally show which  
98 components of each feature is important for individual identification, and that sample  
99 size and level of preprocessing will also affect identification accuracy.

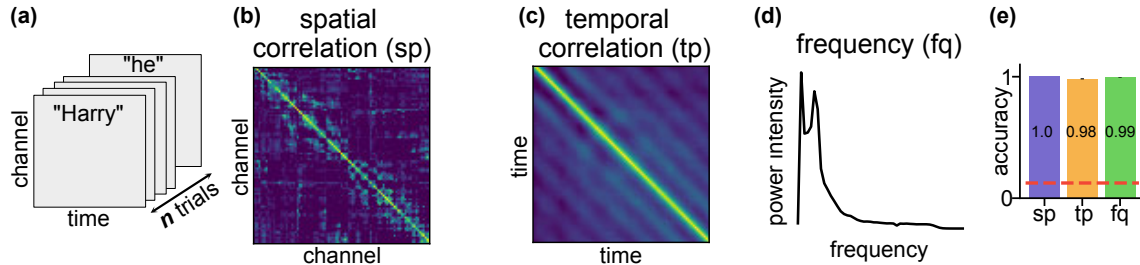

Figure 3: **High within-session identification accuracy on HP data with three interpretable features.** (a) Shape of the HP data before featurization. The HP data consists of participants reading a book chapter one word at a time for 0.5s each. The data is resampled to have the dimension [102 channels, 100 time points,  $n$  trials] where each trial corresponds to one word and  $n$  to the number of words. (b) The spatial correlation feature **sp** is a  $102 \times 102$  Pearson's correlation coefficient matrix computed across the time points and trials. (c) The temporal correlation feature **tp** is a  $100 \times 100$  Pearson's correlation matrix computed across the channels and trials. (d) The frequency feature **fq** is a vector in  $\mathbb{R}^{51}$  where 51 is the number of frequency bands. The power at each band was averaged across channels and trials. (e) Identification accuracy with the three features. The accuracy was averaged across 100 identification runs of 8 individuals. The red dashed line represents the chance level ( $= 0.125$ ). The error bars are the SE across individuals and identification runs and are invisible due to their small values.

100 **Within-session identification is surprisingly easy.** To measure identifiability,  
101 we consider the test accuracy of a classifier trained to identify participants from their  
102 MEG recording. We first focus on within session identifiability. In this context, we  
103 assume that each participant undergoes one session. A classifier is trained on a subset

104 of the session, in which each trial is labeled with the identity of the participant it  
105 corresponds to. In our framework, we refer to the training set as the source set. Then,  
106 on held-out test data, the classifier predicts which participant is associated with each  
107 test trial. We refer to the test set as the target set. As an example, we investigated  
108 individual identifiability on a MEG dataset of *eight* participants during a reading task.  
109 Participants were asked to read a chapter of Harry Potter [23] while each word was  
110 presented for 0.5s on a screen. The Harry Potter (HP) data is a single-session dataset:  
111 the data for each individual were collected on a single visit of the MEG scanner.  
112 Hence the source and target set are non-overlapping subsets of that single session.  
113 We trained a random forest classifier [24] using the MEG recording of all channels at  
114 a randomly selected time point, a flattened vector representing the snapshot of the  
115 topographic map (topomap) of the brain activity. Under this setting, we are asking  
116 if there is any individual-specific information contained in the topomap, the basic  
117 element of MEG recording. We split the dataset into 10 non-overlapping folds and use  
118 one as the target (testing) set and the other nine as the source (training) set. This  
119 10-fold cross-validation scheme yielded a high identification accuracy (0.94) while the  
120 chance accuracy is only 0.125. This surprisingly high accuracy on merely 0.05s of  
121 MEG data suggests the existence of strong patterns detected by the random forest  
122 classifier. This strong pattern may be contained on the transient spatial distribution  
123 of an individual's MEG activity and is strongly distinctive of an individual. This high  
124 accuracy with the limited amount of information used suggests that within-session  
125 identification is a strikingly easy task.

126

127 **Interpretable MEG features yield high identification accuracy.** The random  
128 forest classifier may not enclose enough information to explain the high identifiability of  
129 the HP data because of the black-box nature of the algorithm. The topomap mainly con-  
130 tains the spatial information: how heterogeneous the amplitude of the signal is across  
131 channels at a certain time point. High identifiability may also be attained using tempo-  
132 ral and frequency information. We proposed three interpretable features for individual  
133 identification to further disseminate the individual-specific information. These features  
134 are interpretable because they bear biological meanings and hence can be used to  
135 interpret the high identification accuracy. The three features were based on  $n$  randomly  
136 selected trials (words) and have the shape [102 channels, 100 time points,  $n$  trials]

137 (Figure 3(a)). **sp** (Figure 3(b)) is the spatial correlation between different sensors  
138 which may be related to individual-specific correlated activities between areas of the  
139 brain or the anatomy of the individual (e.g. brain size) [8, 25]. **tp** (Figure 3(c)) is  
140 the temporal correlation between the time points into a trial. A high value in the **tp**  
141 matrix indicates highly synchronous brain signals between two temporal points, which  
142 might be related to participant specific stimulus processing latencies. A relevant study  
143 shows that the temporal change of brain activities in auditory steady-state responses  
144 are different between individuals [26]. **fq** (Figure 3(d)) represents the distribution of  
145 the power intensity of signal frequency. Individual differences might also manifest as  
146 differences in the power distribution along frequency bands [27, 22].

147 We used the 1-Nearest Neighbor (1NN) identification procedure, similar to Finn et  
148 al. [15], to test if the three features are *brainprints* for the within-session identification  
149 task. For a given feature such as **sp**, the feature is computed for each participant on  
150 the source set using  $n$  trials. Target set features are also computed (but unlabeled)  
151 with the same number of trials. The 1NN classifier simply assigns each target feature  
152 to the participant with the closest source feature (we use correlation to measure  
153 distance). The matching process is repeated for 100 runs to account for the variance  
154 of the feature on the sampled trials. The simplicity of this 1NN classifier optimizes the  
155 interpretability of the result. With  $n = 300$  trials all three features achieve near-perfect  
156 identification accuracy (Figure 3 (e), the accuracy for **sp**, **tp** and **fq** is respectively  
157  $1 \pm 0$ ,  $0.9825 \pm 0.0046$ ,  $0.995 \pm 0.0025$ , mean  $\pm$  SE,  $p < 0.0002$ , see Supplement F for  
158 how we computed the p-values). In fact, the high identifiability can be attained with  
159 as few as  $n = 100$  trials (Supplement C). The high identifiability with **sp**, **tp** and  
160 **fq** suggests they are *brainprints*, at least for identifying individuals within a session.  
161 Therefore, multiple features capturing different aspects of the MEG activity can be  
162 used for identifying individuals.

163 **Cross-session identification confirms the existence of brainprints.** The high  
164 within-session identification accuracy suggests **sp**, **tp**, and **fq** are individual-specific  
165 within a session. Artifacts such as environmental noise and equipment configurations,  
166 however, might be the main contributing factor to within-session identification accuracy.  
167 Hence, we examined the consistency of the three features when the same type of  
168 task data was collected from each individual on multiple sessions. This setting tests  
169 if the features are preserved over time, i.e. if they are indeed *brainprints* and not



170 mere artifacts. If the identifiability is significantly lower on multi-session datasets, the  
171 high identifiability on the HP data may be a mere result of session-specific artifacts,  
172 since the recording session for each individual is performed on different days. If high  
173 cross-session identifiability is observed, **sp**, **tp**, and **fq** can be considered genuine  
174 brainprints because they are unique to individual and invariant between sessions. This  
175 would also suggest low cross-session and high within-session variability (Figure 2).

176 We tested the three features on two multi-session datasets: FST [28], a four-  
177 session dataset where four individuals were shown pictures of familiar and unfamiliar  
178 faces and SEN, a three-session dataset where four individuals were shown sentences.  
179 Since each individual has recordings conducted on different days, we can set the  
180 target and source data to be from different sessions (Figure 4 (a)), to test the role  
181 of environmental artifacts and further confirm the existence of the brainprints. In  
182 addition to identification accuracy, we used a relaxed version, the *rank accuracy*, which  
183 captures more information in a failure case where an individual is mis-identified. Rank  
184 accuracy captures the rank of the correct assignment out of all possible assignments;  
185 it is 1 if the target feature of each individual have the largest similarity to the source  
186 features for that individual, and is  $\frac{1}{K}$  if the similarity is the smallest. The chance rank  
187 accuracy is  $\frac{K+1}{2K}$ .

188 Both **tp** and **fq** achieved almost perfect average identification and rank accuracy on  
189 both FST and SEN data whereas **sp** achieved lower but still well above-chance accuracy  
190 (Figure 4 (c),(f)). The high cross-session identification accuracy of **sp**, **tp**, and **fq**  
191 confirms that it is reasonable to call them brainprints for individual identification in  
192 MEG. The lower identification accuracy for **sp** was due to low accuracy on a two of  
193 the individuals ( Figure 4 (d),(g)) in both datasets. However, identification accuracy  
194 of these individuals is not consistently low across all session pairs (Figure 4 (b),(e))  
195 indicating that **sp** only perform worse for these subjects between certain sessions.

196 For SEN data, the MEG recording of two subjects were taken on the same day for  
197 session 1 and 2. Since the identification accuracy of **sp** corresponding to these two  
198 pair of sessions (1 vs 2 and 2 vs 1) did not yield higher accuracy than the average (the  
199 mean identification accuracy between these two session pairs is 0.655, lower than 0.72,  
200 the mean across all cross-session pairs), the accuracy for **sp** was not inflated due to  
201 this issue with duplicated recording times. In line with the results on the HP dataset,  
202 **sp**, **tp**, and **fq** are the brainprints that are consistent even between recording sessions  
203 with **tp**, **fq** leading to higher identifiability.

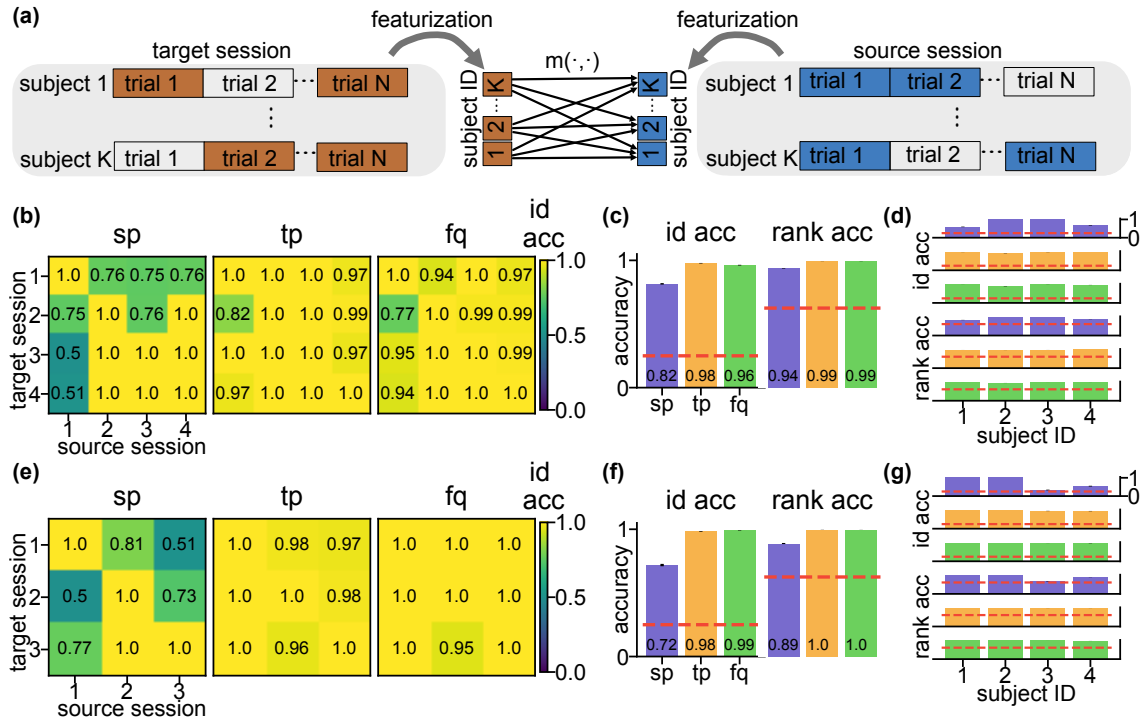

**Figure 4: Cross-session identification on FST and SEN data confirms existence of brainprints.** (a) Schema of the cross-session identification task. For one identification run, the features of each individual are computed using randomly sampled trials ( $N = 300$ ) from both the source and target session. Target session features are then classified by selecting the individual with the largest similarity score in the source session. (b) Heat maps of the cross-session identification accuracy using the three features on FST data. Each grid represents the average accuracy across 4 individuals and 100 identification runs. The within-session accuracy (diagonal entries) are computed using the same source-target splitting procedure as on the Harry Potter data to avoid data leakage. (c) Average cross-session identification accuracy and rank accuracy for each feature on FST data. Within-session accuracy (diagonal entries in (b)) were excluded in computation. Error bars are the SE across cross-sessions ( $N = 12$ ), individuals ( $N = 4$ ), and identification runs ( $N = 100$ ) and are invisible due to small values. Red dashed lines are the chance level for the identification accuracy ( $= 0.25$ ) and rank accuracy ( $= 0.625$ ). (d) Identification and rank accuracy on FST data by individual. Within-session accuracy were excluded in computation. Error bars are the SE across cross-sessions ( $N = 12$ ) and and identification runs ( $N = 100$ ) and are invisible due to small values. The red dashed lines are the same as in (c). (e)-(g), same as (b)-(d) but on SEN data with the same number of individuals and identification runs ( $N = 4$  and  $N = 100$ ) but different number of cross-sessions ( $N = 6$ ). The high identification accuracy with the three features on multi-session datasets confirms these features can be brainprints for individual identification.

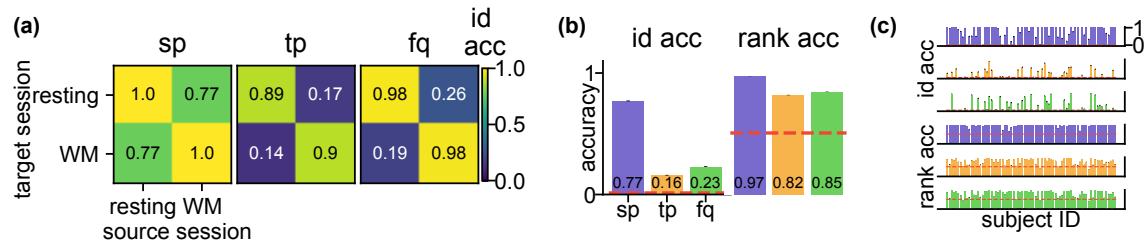

Figure 5: **Consistent sp for cross-task identification on Human Connectome Project data.** (a) Heat maps of the cross-task identification accuracy using the three features on HP data. Both resting and working memory (WM) data were recorded on the same day. Each grid represents the average accuracy across 77 individuals and 100 identification runs. The within-task accuracy (diagonal entries) are computed using the same source-target splitting procedure as on the Harry Potter data to avoid data leakage. (b) Average cross-task identification accuracy and rank accuracy for each feature on HCP data. Within-task accuracy (resting vs. resting, WM vs. WM) are excluded in computation. Error bars are the SE across cross-task sessions ( $N = 2$ ), individuals ( $N = 77$ ), and identification runs ( $N = 100$ ) and are invisible due to small values. The red dashed lines are the chance level for the identification accuracy ( $= \frac{1}{77}$ ) and rank accuracy ( $= \frac{39}{77}$ ). (c) Identification (upper three rows) and rank (lower three rows) accuracy on HP data by individual. Within-task accuracy are excluded in computation. Error bars are the SE across cross-task sessions ( $N = 2$ ) and identification runs ( $N = 100$ ) and are invisible due to small values. The red dashed lines are the same as in (b). These results indicate that **sp** is consistent even when performing different tasks (resting vs WM) in the source and target session.

204 **Spatial brainprints are consistent across resting-state and tasks.** The high  
 205 performance and interpretability of the brainprints make it enticing to study the factors  
 206 and the underlying mechanism for identification. We looked at the performance of  
 207 these features between two sessions of different types collected on the same day to  
 208 test their consistency between different brain states. We compared the features using  
 209 the Human Connectome Project (HCP) MEG data [5] between a resting-state session  
 210 in which individuals ( $N=77$ ) rest and do not perform a task and a task-MEG session  
 211 where these same individuals view images and perform a working memory task.

212 Consistent with the cross-session results in Figure 4, **sp** yielded a high identification  
 213 accuracy (Figure 4 (b),  $0.77 \pm 0.0034$ , mean  $\pm$  SE,  $p < 0.0002$ ), well above the 0.013  
 214 random baseline. This suggests that the spatial fingerprint is consistent between  
 215 different brain states which confirms a similar finding in fMRI [15]. The by-individual  
 216 identification accuracy (Figure 5(c)) shows that there was a small subset of individuals

217 whose accuracy is below random, which may be due to the lack of head position  
 218 correction in the HCP collection protocol. **tp** and **fq** did not perform as well as  
 219 **sp**, suggesting that the temporal rhythm and frequency involved might be different  
 220 between resting-state and task [29, 30].

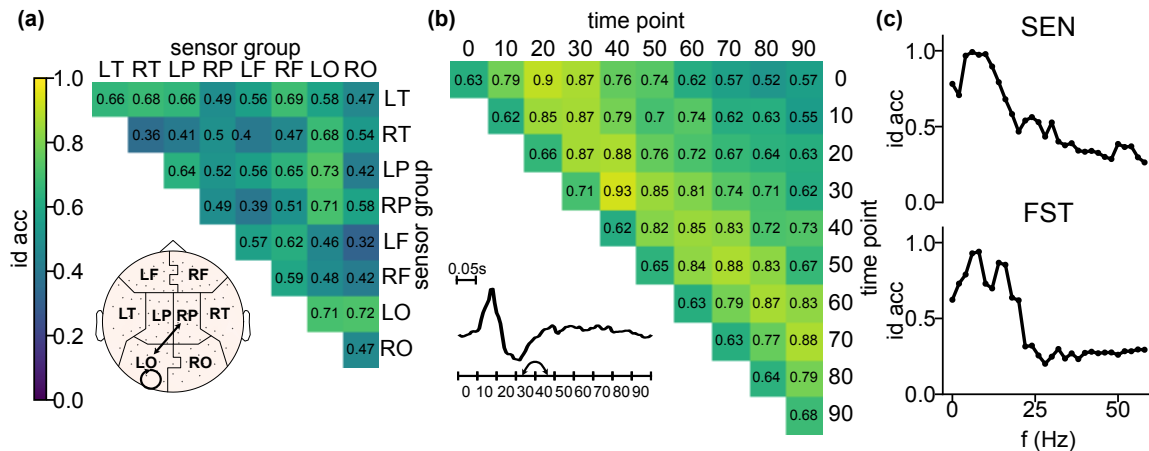

Figure 6: **Identification accuracy of components of the features.** See Supplement D for **a,b** on FST data. **(a)** Identification accuracy of the sub-features of **sp** on SEN data. Each grid represents the identification accuracy using the corresponding entries of **sp** averaged across cross-sessions ( $N = 6$ ), individuals ( $N = 4$ ), and identification runs ( $N = 100$ ). Inset is the plot of the sensor group layout and edges correspond to the sensor group pair with over 0.7 accuracy for both FST and SEN. The topomap is plotted using the python MNE package [31]. **(b)** Identification accuracy of the sub-features of **tp** on SEN data. Each grid represents the identification accuracy using the corresponding entries of **tp** averaged across the same dimensions as in **a**. Inset is an example MEG signal of one individual averaged across channels ( $N = 102$ ) and trials ( $N = 1000$ ). Arrows correspond to the entries of the heatmap with over 0.9 accuracy for both FST and SEN. **(c)** Identification accuracy of the sub-features of **fq** on SEN (upper plot) and FST (lower plot) data. Each dot represents the identification accuracy using the corresponding entries of **tp** averaged across cross-sessions ( $N = 6$  for SEN and 12 for FST), individuals ( $N = 4$ ), and identification runs ( $N = 100$ ). Accuracy values of  $f$  larger than 60 Hz were truncated since the curve became flat. Error bars are SE across cross-sessions, individuals, and identification runs and are invisible due to small values. The curve peaks at  $f = 6$  Hz for SEN and  $f = 8$  Hz for FST. The accuracy of some components of a feature is consistently higher than the rest on both datasets, indicating that some parts of a certain feature may be more important in identifying individuals.

221 The rank accuracy of **tp** and **fq** (Figure 5(b),  $0.82 \pm 0.0017$  and  $0.85 \pm 0.0016$ , mean  
 222  $\pm$  SE,  $p < 0.0002$  for all) are much higher than the baseline (0.506). The majority of

223 the individuals also have higher rank accuracy than baseline for **tp** and **fq** (Figure 5(c)).  
224 The higher rank accuracy suggests that **tp** and **fq** may still contain individual-specific  
225 information but are not strong enough to achieve a high identification accuracy. Since  
226 the individuals perform different tasks on the source and target session, the rank  
227 accuracy indicates the potential consistent brainprint that generalizes beyond the task.  
228 It is noticeable that for the HCP dataset, the recording sessions of one individual  
229 were recorded on the same day. Hence one may exercise caution when extending the  
230 conclusions to cross-session datasets.

231 **Not every part of a brainprint is equally important.** What contributes to the  
232 high identifiability of the three brainprints? Understanding the relative contribution  
233 of the components of brainprints could help understand individual identifiability and  
234 variability. We divided the three brainprints into sub-features and looked at their  
235 identification accuracy to see which components contain the most individual-specific  
236 information. **sp** was divided into correlations between groups of sensors. **tp** was  
237 divided into correlations between time intervals. **fq** was divided into frequencies within  
238 a sliding window. We use the SEN and FST dataset to focus on cross-session patterns.

239 For both SEN and FST, the correlations between sensors within Left Occipital  
240 (LO) and between LO and Right Parietal (RP) yielded high accuracy (Figure 6 (a),  
241 inset, and Supplement D). LO is involved in visual processing [32] and RP is involved  
242 in sensory integration [33], both of which are functions recruited by the experimental  
243 task. Due to the nature of the sampled signal and the physical properties of the skull,  
244 each MEG sensor samples coarsely from the brain, making it hard to say whether  
245 MEG spatial correlation effectively corresponds to functional connectivity, especially  
246 for nearby sensors [8]. However, the fact that correlations between faraway groups of  
247 sensors, for example, LT and RT, still have good accuracy suggesting it may be due  
248 to actual functional correlation between these areas, but it could still be the case that  
249 it is the difference in skull shapes that contributes to the high **sp** accuracy.

250 For both SEN and FST, the super-diagonal of the heat map for temporal sub-  
251 features (Figure 6 b and Supplemental Section D) had high accuracy. The super-  
252 diagonal entries correspond to the cross-correlation of the MEG signal between two  
253 consecutive segments of 0.05 s. Hence the rhythm of the signal within a short segment  
254 of time contributes to identifiability, which can also be seen from the banded structure  
255 of **tp** (Figure 2(c)). Moreover, the correlations between fourth and fifth 0.05 s yield

256 considerably high accuracy on both datasets **tp** (Figure 6(b) inset). These time periods  
257 overlap with the time we expect the brain is processing word and picture stimuli [34].

258 The power intensity of frequencies between 4 and 13 Hz yielded the highest accuracy  
259 on both SEN and FST data (Figure 6 c), the peak is 6 Hz for SEN and 8 Hz for FST.  
260 These peaks roughly corresponds to the Theta and Alpha frequency band which are  
261 related to the resting state, memory, and mental coordination [35]. The accuracy is also  
262 moderately high on part of Beta band (14-31 Hz) where attention and concentration  
263 are recruited[35].

264 **Identifiability changes with data size and preprocessing.** The last dimensions  
265 that we investigate is the dependence of individual identification on the amount of  
266 available data and on the level of data preprocessing.

267 We look at the identification accuracy using the three brainprints while increasing  
268 the sample size  $n$ . The identification accuracy increases with the amount of data  
269 used for computing **sp**, **fp**, and **fq** (Figure 7(a)) as the sampling variance becomes  
270 smaller. In general, with 50s of data, the brainprints perform well on cross-session  
271 identification of the same task. **sp** becomes reasonably accurate on the HCP dataset  
272 with 100 trials corresponding to 250s of recording, possibly because more trials are  
273 required to accurately compute features that are distinguishable within a larger pool  
274 of individuals. For FST and SEN, the identification accuracy of **sp** saturates at fewer  
275 number of trials than **tp** and **fq**. It is possible that **sp** requires fewer trials to be  
276 estimated robustly.

277 Preprocessing may also affect identification accuracy. We compared the difference in  
278 the identification and rank accuracy between the raw and preprocessed data (Figure 7  
279 b,c). The changes in accuracy were all statistically significant (Figure 7(b,c),  $p < 10^{-26}$ ,  
280 two-sided paired t-test) when the raw data was preprocessed for all the three features  
281 (Figure 7(b)). For both FST and SEN, preprocessing yielded better accuracy for  
282 **tp** and **fq**. However, for **sp**, the results point in opposite directions: preprocessing  
283 increases identifiability for FST and decreases it for SEN. There was one difference  
284 in the preprocessing pipeline for both datasets: FST preprocessing did not include  
285 head position correction due to a lack of head position recordings. Head position  
286 correction might be changing the signal in non-homogenous ways thereby undermining  
287 the identifiability with **sp**.

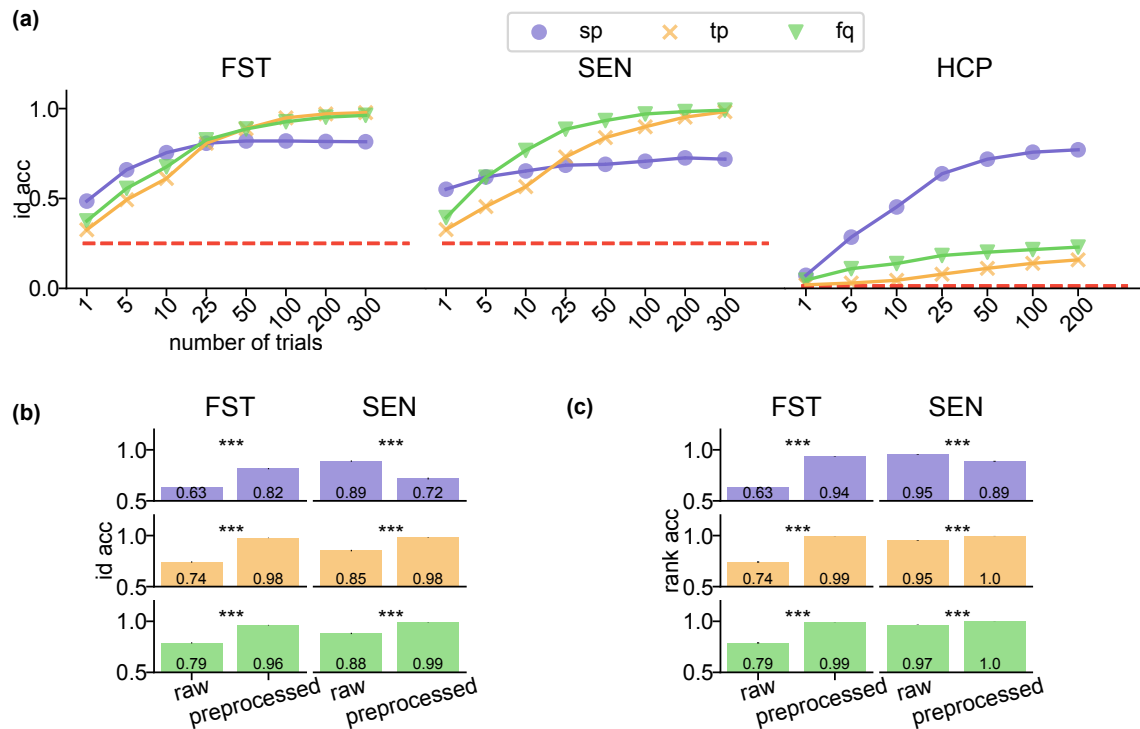

**Figure 7: Factors affecting identification accuracy.** (a) Identification accuracy with respect to the number of trials (sample size) used for the featurization of FST, SEN, and HCP data. Each dot represents the identification accuracy averaged across individuals, identification runs, and cross-sessions (or cross-task sessions) excluding the within-session or within-task results. Error bars are the SE across the corresponding cross-sessions (or cross-task sessions), individuals, and identification runs of each dataset and are invisible due to small values. (b)-(c) Identification (b) and rank (c) accuracy of the three features computed on raw and fully preprocessed FST and SEN data. The same color represents the same feature as in (a). For (b), the identification accuracy across sessions ( $N = 12$  for FST and  $= 6$  for SEN), individuals ( $N = 4$ ), and identification runs ( $N = 100$ ) are put into one vector (of  $N = 4800$  entries for FST and 2400 entries for SEN) for each feature and level of preprocessing. The heights of the bar plots are the mean of the corresponding vector and the error bars are its SE and are invisible due to small values. A two-sided paired  $t$ -test is performed on the binary vectors of the same feature and dataset between the raw and preprocessed data. The p-values for all pairs are less than 0.001. For (c), the rank accuracy were put into one vector in the same way as in (b). The heights of the bar plots are the mean of the corresponding vector and the error bars are its s.d. A two-sided paired  $t$ -test is performed on the vectors of the same feature and dataset between the raw and preprocessed data. The p-values for all pairs are less than 0.001.

## 288 Discussion

289 An individual can be identified with a number of differential characteristics, including  
290 their real ‘fingerprints’. Existing studies have suggested the existence a fingerprint in  
291 brain signals (e.g. [14, 15]). In this paper, we argued that such brainprints also exist in  
292 MEG data and, in fact, there are multiple of them that capture different information  
293 from the MEG data. We showed that these brainprints are likely not by-products of  
294 environmental artifacts and may pertain to the underlying brain response to stimuli.  
295 These analyses, apart from adding to the existing evidence of the brainprints, may  
296 bear alarming meanings in privacy issues and provoke thoughts on how scientific  
297 conclusions based on multiple individuals have to be examined carefully given these  
298 consistent individual-specific features.

299 In this section, we first discuss the implications of these results in detail, following  
300 the same order of the previous section. We then mention limitations and potential  
301 improvement to our analysis of brainprints.

302 **Within-session identifiability.** Using the HP data, we showed that both random  
303 forest classification with topomaps and 1NN classification with certain interpretable  
304 features can be used to correctly identify individuals when the data is collected on a  
305 single session. The high accuracy based on merely 0.5s of data for **sp** and 25s for **tp**  
306 and **fq** is striking since small amounts of data usually leads to inaccurate estimates of  
307 these features, unless the underlying patterns are strong. The easy task of identifying  
308 individuals on single-session dataset points to strong individual-specific patterns which  
309 may or may not be brain-activity related.

310 **Uniqueness of brainprints.** The three features we proposed may not be the only  
311 characteristics of MEG data that can be used for individual identification. However,  
312 these features represent fundamental aspects of MEG data (and even time series in  
313 general) hence they may be a vital first step to understand brainprints. Specifically,  
314 we propose the temporal feature, **tp**, because of the high temporal-resolution of MEG  
315 data. This feature may have not been used for other types of neuroimaging datasets,  
316 suggesting that different features may be informative depending on the nature of  
317 dataset of interest.



318 **Cross-session identifiability.** The high cross-session identification accuracy using  
319 **sp** confirms it is a brainprint, and supports the previous literature on the similar  
320 features in fMRI and EEG [15, 36]. The higher accuracy by **sp**, **tp** and **fq** suggest  
321 that multiple aspects of the individual activity captured by MEG may be used for  
322 identification. The generally lower accuracy from **sp** might be the result of the change  
323 of alignment of sensors for each individual. However, since necessary steps have taken  
324 in the preprocessing pipeline to align the sensors (Supplement A) and each MEG  
325 sensor measures brain activity from a non-trivially large area, it remains unclear if  
326 the issue is the alignment. Another interpretation of this result is that the temporal  
327 and frequency information is more consistent for an individual across time and the  
328 spatial information may slowly evolve over time (e.g., when the individual slowly  
329 moves during the recording).

330 Some source-target session pairs have lower identification accuracy than others for  
331 **sp** (Figure 4 (b),(e)) and the identification accuracy is not necessarily reciprocal, for  
332 example, 0.76 vs 1 (mean, session 3 as source, session 2 as target vs session 2 as source,  
333 session 3 as target) in FST. The lower accuracy of **sp** of on specific source-target  
334 sessions of specific individuals suggests that the identifiability of **sp** may not be  
335 uniform over time and individuals.

336 The three highly identifiable features on FST and SEN represent an alarming  
337 message for experimentalists to consider before releasing MEG data. The existence of  
338 brainprints are also examples of certain functions of the MEG data with high cross-  
339 individual variability preserved across sessions, which has been widely discussed on  
340 various types of neuroimaging data [8, 37, 11, 38, 39]. For example, the high accuracy  
341 with **tp** suggests the existence of individual variability in their temporal response to  
342 the same stimuli. Understanding brainprints will facilitate the understanding of the  
343 underlying anatomical and functional variability between individuals.

344 **Cross-task identifiability.** The consistent performance of **sp** on the HCP data  
345 is in line with a previous study on fMRI of overlapping individuals that the spatial  
346 connectome is preserved between tasks [15]. The rank accuracy of **tp** and **fq** on HCP  
347 data indicates the potential of these two features to be consistent within individuals  
348 (Figure 5(c)) because the majority of individuals still have higher than chance rank  
349 accuracy than identification accuracy. The current underperformance of these two  
350 features, as expected, is likely due to the different temporal dynamics between the

351 resting and task data. This difference may be eliminated by removing the trial part  
352 from the task MEG, focusing on inter-trial intervals or baseline periods, and hence  
353 boost the identification accuracy of **tp** and **fq**. More complicated matching method  
354 may be proposed to further boost the performance of these two brainprints. The  
355 within-task identification accuracy (Figure 4 (a)), on the other hand, is still high for  
356 all features. With the large pool of participants, the high accuracy confirms the strong  
357 individual-specific information contained in the three features within a certain task.

358 **Interpretability of brainprints.** For the three brainprints, higher accuracy seems  
359 to be associated with the components of features with more stimuli-driven activity:  
360 the occipital lobe, the time around the stimulus, and frequency bands the with  
361 highest power intensities (Supplement E). Indeed, MEG signal is most sensitive to  
362 transient, coordinated firings of many neurons that happen after stimulus onset.  
363 This commonality indicates the possibility that higher accuracy is related to event-  
364 related signals, which in turn suggests that identifiability might be caused by different  
365 individuals responding differently to the stimulus. This dependence on stimulus may  
366 explain the low accuracy with **tp** and **fq** on HCP data and also suggest that the  
367 identifiability originates from brain-related activities instead of session- and individual-  
368 specific artifacts.

369 However, these accuracy patterns of specific components of a feature could also  
370 be explained by a signal-to-noise ratio argument: regions, time-points, or frequencies  
371 related to stimulus processing correspond to parts of the underlying brain signal with  
372 higher amplitudes (while the ambient noise amplitude is constant). It might be that  
373 the increase in signal magnitude make the (spatial, temporal or frequency) activity  
374 patterns that are specific to a individual more detectable by increasing their amplitude  
375 relative to the ambient noise, even if these patterns are not inherently related to  
376 stimulus processing and are just consistent features of a individual's brain activity.

377 **Sample size and level of preprocessing.** **sp** accuracy tends to saturate with  
378 fewer number of trials than the other two features on FST and SEN data but with  
379 more trials on HCP data (Figure 7(a)). This difference is likely due to the difference  
380 in the maximum accuracy a feature can attain: in HCP data, **tp** and **fq** has much  
381 lower maximum accuracy and will reach the peak with smaller number of trials. In  
382 FST and SEN data, the spatial pattern may require fewer trials to estimate accurately,

383 as compared to the temporal and frequency features.

384 The artifact removal and temporal filtering in the preprocessing pipeline might  
385 have prevented session-specific noise from contaminating individual-specific features,  
386 resulting in higher accuracy for **tp** and **fq**. The seemingly contradictory accuracy on  
387 **sp** does not justify our results: identifiability using **sp** increases after preprocessing  
388 when not performing head position correction but decreases when performing it. On  
389 the one hand, it is expected that head position correction would improve identifiability  
390 by recentering each individual's data to the same position in each session. On the  
391 other hand, head position correction may remove individual-specific information such  
392 as the head shape, causing the decrease in the accuracy of **sp**. Future work and  
393 analysis of additional datasets are required to investigate this result. The difference in  
394 the accuracy between raw and preprocessed data suggests, for example, encrypting  
395 the data with session-specific noise may lower identification accuracy.

396 **Limitations.** Due to the availability of the multi-session MEG data, more experi-  
397 ments are needed to generalize the conclusions of this paper to a larger population  
398 and more types of tasks. For example, the cross-session identifiability results depend  
399 on 4 subjects and may suffer from high variance. A larger population (with multiple  
400 sessions for each participant) may benefit the interpretation of brainprints to eventually  
401 attribute the high identifiability of certain components of features to the underlying  
402 brain mechanism.

403 Throughout the paper, we assumed both the target and source datasets had the  
404 same pool of participants in the scope of this paper. If we don't know if one individual  
405 from the target set is included in the source set, other classification methods which allow  
406 for abstaining from classification (e.g. [40, 41]) may be used to account for the case  
407 when no label in the source set can be assigned to the individual. This situation is an  
408 example of a more realistic identification problem because an individual's participation  
409 in multiple MEG studies is usually unknown to the public.

410 **Future solutions.** More complicated features can be proposed which combine the  
411 spatial, temporal, and frequency information to improve identifiability. For example,  
412 functional connectivity at different frequency bands has been used to identify twins  
413 from other participants [17]. New feature similarity function that focuses on the  
414 structure of the correlation matrices may also be used to improve accuracy [42].

415 Metric learning techniques [43] can also be used to learn the similarity function in  
416 a supervised manner which may boost the performance with sufficient amount of  
417 labeled MEG data.

418 On the other hand, given the high identification accuracy with brainprints in this  
419 study, privacy-preserving algorithms need to be proposed to account for this privacy  
420 issue. Federated learning method [44] may be a promising framework as data collected  
421 from multiple sessions and sites can be analyzed together without revealing critical  
422 information of each specific dataset.

## 423 Methods

424 **Within- vs cross- session.** We call a pair of *source* and *target* sets "within-session"  
425 if, for each individual, both datasets were collected in the same visit to the scanner.  
426 For example, two blocks of a resting-state recording of a participant collected on the  
427 same day are within-session. If the two datasets are collected on different days for  
428 each individual, they are "cross-session". For example, a resting state recording on  
429 day 1 and another resting-state recording on day 2 are cross-session. Individuals with  
430 within-session data may be easier to identify since the source and target data were  
431 collected under almost the same environment.

432  
433 **Within-session data.** Individuals were asked to read a chapter of Harry Potter  
434 [23] while each word was presented for 0.5 s on a screen. There were 306 sensors at  
435 102 locations where each location has one magnetometer and two planar gradiometers  
436 whose signal was averaged. The sampling frequency of the data was 1000 Hz which was  
437 further downsampled to 200 Hz. Details about the preprocessing of all the datasets  
438 in this paper can be found in Supplement A. The data was parsed into trials where  
439 each trial corresponds to the MEG recording when an individual was reading a word.  
440 Specifically, the trials of individual  $k$  is  $\{X_i^k \in \mathbb{R}^{102 \times 100}\}_{i=1}^{I_k}$  where  $I_k$  is the number  
441 of trials for individual  $k$ , 102 represents the number of spatial channels, and 100  
442 represents the number of temporal points in the trial. Since the recording of each  
443 individual was collected in one session, we simply split the data into a target and  
444 source dataset for the within-session identification task.

445  
446 **Cross-session data.** We considered the following two datasets which have record-  
447 ings on multiple days:

448 1- FST data [28], shared online:<sup>1</sup> individuals saw faces with each face appearing  
449 on the screen. Each trial lasted 0.5 s. There were 4 individuals and 4 sessions. The  
450 sampling frequency was 1000 Hz and was downsampled to 200 Hz. Intervals between  
451 consecutive sessions were several days.

452 2- SEN data (unpublished anonymized citation): individuals read sentences. Each

---

<sup>1</sup>[https://figshare.com/articles/FST\\_raw\\_data/4233107](https://figshare.com/articles/FST_raw_data/4233107)

453 trial lasted 0.5 s. There were 4 individuals and 3 sessions. The sampling frequency  
454 was 1000 Hz and was downsampled to 200 Hz. Intervals between consecutive sessions  
455 ranged from days to weeks. In this dataset, two sessions for two individuals were  
456 recorded at the same day.

457 The shape of one trial of the two datasets is 102 channels by 100 time points, the  
458 same as the Harry Potter data. We used 300 trials to create features for each run of  
459 identification. For the within-session identification (diagonal entries of Fig 3 (b) (c)),  
460 we split the recording for each individual into non-overlapping source and target set  
461 before featurization.

462

463 **Task vs resting data.** We looked at the Human Connectome Project data<sup>2</sup>[5].  
464 There were two sessions, one resting-state recording and one working-memory (WM)  
465 task recording where the stimuli were images for the participants to remember. Each  
466 trial of the WM corresponded to the 2.5 s of the recording after the onset of the  
467 stimulus. The two datasets had 77 individuals in common and we only looked at these  
468 individuals. There were 146 channels and the signal was downsampled to 200 Hz. The  
469 two sessions were collected on the same day with a break of several hours. We used  
470 200 trials for featurization for each run of identification due to fewer number of total  
471 trials as compared to the aforementioned datasets.

472

473 **Random forest identification with raw features.** We trained a random forest  
474 classifier with 256 estimators by first concatenating all the trials of all the individuals  
475 along the time dimension, resulting in  $\mathbf{X} \in \mathbb{R}^{102 \times N}$  where  $N = \sum_{k=1}^8 100I_k$  is the total  
476 number of time points of all the individuals. The training data is  $\{X(:, i) \in \mathbb{R}^{102}\}_{i=1}^N$   
477 is a flattened vector with 102 entries corresponding to the signal across all channels  
478 at one time point, and the training label is  $y_i \in \{1, 2, \dots, 8\}$ . Data was z-scored by  
479 channel separately on training and testing data.

480

481 **Interpretable MEG features.** Let  $X \in \mathbb{R}^{102 \times 100 \times n}$  represent the recording used  
482 for featurization, with 102 channels, 100 time points, and  $n$  randomly sampled trials.

---

<sup>2</sup><https://www.humanconnectome.org/study/hcp-young-adult>

483 The three features were defined as follows:

484 1- Spatial correlation (**sp**): Pearson correlation between channels averaged over  
485 time.  $X$  was reshaped into  $\mathbb{R}^{102 \times 100n}$  before the correlations between rows of the  
486 reshaped matrix were computed.

487 2- Temporal correlation (**tp**): Pearson correlation between time points averaged  
488 over channels.  $X$  was reshaped into  $\mathbb{R}^{100 \times 102n}$  before the correlations between rows of  
489 the reshaped matrix were computed.

490 3- Frequency (**fq**): power spectrum averaged over channels. Power spectrum of  
491  $X(i, :, j)$  was computed using a Tukey window with shape parameter of 0.25 and  
492 window size of 100 time points for  $i = 1, \dots, 102, j = 1, \dots, n$ . The final power  
493 spectrum was obtained by averaging across  $i, j$ .

494

**Identification using 1NN.** We performed  $R = 100$  identification runs. In identification run  $r$ , we randomly split the Harry Potter dataset into non-overlapping source and target set, z-scored the source and target by channel separately, and computed the feature  $x_{i,r,F}^\alpha$  averaged over  $n = 300$  randomly sampled trials using data  $\alpha \in \{\text{target}, \text{source}\}$  for individual  $i$  and  $F \in \{\mathbf{sp}, \mathbf{tp}, \mathbf{fq}\}$ . The features from the target to the source set were matched with a labeling with replacement protocol :

$$\hat{y}(x_{i,r,F}^{\text{target}}) = \arg \max_{j \in \{1,2,\dots,K\}} m(x_{i,r,F}^{\text{target}}, x_{j,r,F}^{\text{source}})$$

495 where  $K = 8$  is the total number of individuals and  $m(\cdot, \cdot)$  is the similarity function  
496 measuring the similarity between the two features. We used Pearson correlation  
497 as our similarity function. The identification accuracy for individual  $i$  and fea-  
498 ture  $F$  is  $\frac{1}{R} \sum_{r=1}^R \mathbb{1}_{\hat{y}(x_{i,r,F}^{\text{target}})=i}$ . The averaged identification accuracy for feature  $F$  is  
499  $\frac{1}{KR} \sum_{i=1}^K \sum_{r=1}^R \mathbb{1}_{\hat{y}(x_{i,r,F}^{\text{target}})=i}$ . The random baseline is  $\frac{1}{K}$ .

500 When the source set and target set were from the same session, we split the dataset  
501 into non-overlapping sets as we did in the within-session identification. We didn't  
502 split data when the source and target data are from different sessions since there is  
503 no potential data leakage. We z-scored the data by channel on the source and target  
504 separately.

505

506 **Rank accuracy.** The rank accuracy of individual  $i$  on one run of identification (sup-  
507 pressing notations of feature  $F$  and run  $r$ ) is defined as  $\frac{1}{K}\text{rank}(m(x_i^{\text{target}}, x_i^{\text{source}}))$   
508 where  $K$  is the number of individuals,  $\text{rank}(m(x_i^{\text{target}}, x_i^{\text{source}}))$  is over  $\{m(x_i^{\text{target}}$   
509  $, x_j^{\text{source}}), j = 1, 2, \dots, K\}$ . The rank accuracy equals to 1 if the feature of the same  
510 individual has the largest similarity between the source and target sets among all  $K$   
511 individuals, and is  $\frac{1}{K}$  if the similarity is the smallest. The rank accuracy captures  
512 more information in a failure case where an individual is mis-identified. The random  
513 baseline for the rank accuracy is  $\frac{K+1}{2K}$ .

514

515 **Sub-features.** Each feature was decomposed as follows:

516 1- **sp:** The sensors were partitioned into 8 subgroups according to the map in  
517 Figure 1 of [45]: Left Frontal (LF), Right Frontal (RF), Left Temporal (LT), Right  
518 Temporal (RT), Left Parietal (LP), Right Parietal (RP), Left Occipital (LO), Right  
519 Occipital (LO). Each subfeature was the rows and columns of the spatial correlation  
520 matrix corresponding to the sensors in one of the eight groups: let  $\Sigma_s \in \mathbb{R}^{102 \times 102}$  be  
521 the spatial correlation matrix, then the subfeature corresponding to the correlation  
522 between RT and LT, for example, is  $\Sigma_s(\text{ind}_{RT}, \text{ind}_{LT})$  where  $\text{ind}_{RT}$  is the set of channel  
523 indices in the RT group and  $\text{ind}_{LT}$  corresponds to the LT group.

524 2- **tp:** The 100 temporal points were divided into 10 consecutive segments con-  
525 taining 10 time points. Each subfeature was the rows and columns of the temporal  
526 correlation matrix corresponding to one of the ten segments: let  $\Sigma_t \in \mathbb{R}^{100 \times 100}$  be the  
527 spatial correlation matrix, then subfeature corresponding to the correlation between  
528 the first and second time segment, for example, is  $\Sigma_t(1 : 10, 11 : 20)$ .

529 3- **fq:** Each subfeature was the segment of the frequency feature vector correspond-  
530 ing to  $[f, f + 10]$  Hz where  $f \in \{0, 2, \dots, 90\}$  Hz.

531 **Raw vs preprocessed data.** In Figure 6 (b), we compare the identification accuracy  
532 between the raw and preprocessed data for FST and SEN dataset. The details of  
533 the full preprocessing pipeline is included in the supplement. In FST dataset, for a  
534 given feature and dataset, there were 4800 binary matching results (12 cross-session  
535 comparisons  $\times$  4 individuals  $\times$  100 identification runs) where each one corresponds  
536 to the result of deciding which individual from the source session matches the one  
537 individual from the target session. A Pearson's  $\chi^2$  test was performed to determine



538 if there is a significant difference in the identification accuracy between the raw and  
539 preprocessed data. In SEN dataset, for a given feature and dataset, there were  
540 2400 binary matching results (6 cross-session comparisons  $\times$  4 individuals  $\times$  100  
541 identification runs) instead.

## 542 References

- 543 [1] Thomas Landrain, Morgan Meyer, Ariel Martin Perez, and Remi Sussan. Do-  
544 it-yourself biology: challenges and promises for an open science and technology  
545 movement. *Systems and synthetic biology*, 7(3):115–126, 2013.
- 546 [2] Krzysztof Gorgolewski, Oscar Esteban, Gunnar Schaefer, Brian Wandell, and  
547 Russell Poldrack. Openneuro—a free online platform for sharing and analysis of  
548 neuroimaging data. *Organization for human brain mapping. Vancouver, Canada*,  
549 1677(2), 2017.
- 550 [3] Latanya Sweeney. Simple demographics often identify people uniquely. *Health*  
551 (*San Francisco*), 671:1–34, 2000.
- 552 [4] Halbert L Dunn. Record linkage. *American Journal of Public Health and the*  
553 *Nations Health*, 36(12):1412–1416, 1946.
- 554 [5] David C Van Essen, Stephen M Smith, Deanna M Barch, Timothy EJ Behrens,  
555 Essa Yacoub, Kamil Ugurbil, Wu-Minn HCP Consortium, et al. The wu-minn  
556 human connectome project: an overview. *Neuroimage*, 80:62–79, 2013.
- 557 [6] Jaewoo Lee and Chris Clifton. Differential identifiability. In *Proceedings of the*  
558 *18th ACM SIGKDD international conference on Knowledge discovery and data*  
559 *mining*, pages 1041–1049, 2012.
- 560 [7] Craig Gentry. Fully homomorphic encryption using ideal lattices. In *Proceedings*  
561 *of the forty-first annual ACM symposium on Theory of computing*, pages 169–178,  
562 2009.
- 563 [8] Giles L Colclough, Mark W Woolrich, PK Tewarie, Matthew J Brookes, Andrew J  
564 Quinn, and Stephen M Smith. How reliable are meg resting-state connectivity  
565 metrics? *Neuroimage*, 138:284–293, 2016.
- 566 [9] Katherine S Button, John PA Ioannidis, Claire Mokrysz, Brian A Nosek, Jonathan  
567 Flint, Emma SJ Robinson, and Marcus R Munafò. Power failure: why small sample  
568 size undermines the reliability of neuroscience. *Nature Reviews Neuroscience*,  
569 14(5):365–376, 2013.

- 570 [10] Russell A Poldrack, Chris I Baker, Joke Durnez, Krzysztof J Gorgolewski, Paul M  
571 Matthews, Marcus R Munafò, Thomas E Nichols, Jean-Baptiste Poline, Edward  
572 Vul, and Tal Yarkoni. Scanning the horizon: towards transparent and reproducible  
573 neuroimaging research. *Nature reviews neuroscience*, 18(2):115, 2017.
- 574 [11] Vincent Wens, Mathieu Bourguignon, Serge Goldman, Brice Marty, Marc Op  
575 De Beeck, Catherine Clumeck, Alison Mary, Philippe Peigneux, Patrick Van Bo-  
576 gaert, Matthew J Brookes, et al. Inter-and intra-subject variability of neuromag-  
577 netic resting state networks. *Brain topography*, 27(5):620–634, 2014.
- 578 [12] M Poulos, M Rangoussi, N Alexandris, and A Evangelou. Person identification  
579 from the eeg using nonlinear signal classification. *Methods of information in*  
580 *Medicine*, 41(01):64–75, 2002.
- 581 [13] Lan Ma, James W Minett, Thierry Blu, and William SY Wang. Resting state  
582 eeg-based biometrics for individual identification using convolutional neural  
583 networks. In *2015 37th Annual International Conference of the IEEE Engineering*  
584 *in Medicine and Biology Society (EMBC)*, pages 2848–2851. IEEE, 2015.
- 585 [14] Xiang Zhang, Lina Yao, Salil S Kanhere, Yunhao Liu, Tao Gu, and Kaixuan Chen.  
586 Mindid: Person identification from brain waves through attention-based recurrent  
587 neural network. *Proceedings of the ACM on Interactive, Mobile, Wearable and*  
588 *Ubiquitous Technologies*, 2(3):1–23, 2018.
- 589 [15] Emily S Finn, Xilin Shen, Dustin Scheinost, Monica D Rosenberg, Jessica Huang,  
590 Marvin M Chun, Xenophon Papademetris, and R Todd Constable. Functional  
591 connectome fingerprinting: identifying individuals using patterns of brain connec-  
592 tivity. *Nature neuroscience*, 18(11):1664, 2015.
- 593 [16] Oscar Miranda-Dominguez, Brian D Mills, Samuel D Carpenter, Kathleen A  
594 Grant, Christopher D Kroenke, Joel T Nigg, and Damien A Fair. Connectotyping:  
595 model based fingerprinting of the functional connectome. *PloS one*, 9(11), 2014.
- 596 [17] M Demuru, AA Gouw, A Hillebrand, CJ Stam, BW Van Dijk, P Scheltens,  
597 BM Tijms, E Konijnenberg, M Ten Kate, A Den Braber, et al. Functional  
598 and effective whole brain connectivity using magnetoencephalography to identify  
599 monozygotic twin pairs. *Scientific reports*, 7(1):1–11, 2017.

- 600 [18] Andrew James Anderson, Kelsey McDermott, Brian Rooks, Kathi L Heffner,  
601 David Dodell-Feder, and Feng V Lin. Decoding individual identity from brain  
602 activity elicited in imagining common experiences. *Nature communications*,  
603 11(1):1–14, 2020.
- 604 [19] Christian Wachinger, Polina Golland, William Kremen, Bruce Fischl, Martin  
605 Reuter, Alzheimer’s Disease Neuroimaging Initiative, et al. Brainprint: A dis-  
606 criminative characterization of brain morphology. *NeuroImage*, 109:232–248,  
607 2015.
- 608 [20] Blair C Armstrong, Maria V Ruiz-Blondet, Negin Khalifian, Kenneth J Kurtz,  
609 Zhanpeng Jin, and Sarah Laszlo. Brainprint: Assessing the uniqueness, col-  
610 lectability, and permanence of a novel method for erp biometrics. *Neurocomputing*,  
611 166:59–67, 2015.
- 612 [21] Christian Wachinger, Polina Golland, and Martin Reuter. Brainprint: Identifying  
613 subjects by their brain. In *International Conference on Medical Image Computing*  
614 *and Computer-Assisted Intervention*, pages 41–48. Springer, 2014.
- 615 [22] Debadatta Dash, Paul Ferrari, and Jun Wang. Spatial and spectral fingerprint in  
616 the brain: Speaker identification from single trial meg signals. In *INTERSPEECH*,  
617 pages 1203–1207, 2019.
- 618 [23] JK Rowling. *of Book: Harry Potter and the Sorcerer’s Stone*. Year: Scholastic  
619 Press/1997, 1997.
- 620 [24] Andy Liaw, Matthew Wiener, et al. Classification and regression by randomforest.  
621 *R news*, 2(3):18–22, 2002.
- 622 [25] Sofie S Meyer, James Bonaiuto, Mark Lim, Holly Rossiter, Sheena Waters, David  
623 Bradbury, Sven Bestmann, Matthew Brookes, Martina F Callaghan, Nikolaus  
624 Weiskopf, et al. Flexible head-casts for high spatial precision meg. *Journal of*  
625 *neuroscience methods*, 276:38–45, 2017.
- 626 [26] H-RM Tan, Joachim Gross, and PJ Uhlhaas. Meg—measured auditory steady-  
627 state oscillations show high test–retest reliability: A sensor and source-space  
628 analysis. *Neuroimage*, 122:417–426, 2015.

- 629 [27] Douglas Owen Cheyne and Paul Ferrari. Meg studies of motor cortex gamma  
630 oscillations: evidence for a gamma “fingerprint” in the brain? *Frontiers in human*  
631 *neuroscience*, 7:575, 2013.
- 632 [28] Mark D Vida, Adrian Nestor, David C Plaut, and Marlene Behrmann. Spa-  
633 tiotemporal dynamics of similarity-based neural representations of facial identity.  
634 *Proceedings of the National Academy of Sciences*, 114(2):388–393, 2017.
- 635 [29] Sheng Zhang and Chiang-Shan R Li. Task-related, low-frequency task-residual,  
636 and resting state activity in the default mode network brain regions. *Frontiers in*  
637 *psychology*, 3:172, 2012.
- 638 [30] Omer Grigg and Cheryl L Grady. Task-related effects on the temporal and spatial  
639 dynamics of resting-state functional connectivity in the default network. *PloS*  
640 *one*, 5(10), 2010.
- 641 [31] Alexandre Gramfort, Martin Luessi, Eric Larson, Denis A Engemann, Daniel  
642 Strohmeier, Christian Brodbeck, Lauri Parkkonen, and Matti S Hämäläinen. Mne  
643 software for processing meg and eeg data. *Neuroimage*, 86:446–460, 2014.
- 644 [32] Tony Ro, Bruno Breitmeyer, Philip Burton, Neel S Singhal, and David Lane.  
645 Feedback contributions to visual awareness in human occipital cortex. *Current*  
646 *biology*, 13(12):1038–1041, 2003.
- 647 [33] Oliver Jakobs, Robert Langner, Svenja Caspers, Christian Roski, Edna C Cieslik,  
648 Karl Zilles, Angela R Laird, Peter T Fox, and Simon B Eickhoff. Across-study  
649 and within-subject functional connectivity of a right temporo-parietal junction  
650 subregion involved in stimulus–context integration. *Neuroimage*, 60(4):2389–2398,  
651 2012.
- 652 [34] Riitta Salmelin. Clinical neurophysiology of language: the meg approach. *Clinical*  
653 *Neurophysiology*, 118(2):237–254, 2007.
- 654 [35] Pravat K Mandal, Anwesha Banerjee, Manjari Tripathi, and Ankita Sharma. A  
655 comprehensive review of magnetoencephalography (meg) studies for brain func-  
656 tionality in healthy aging and alzheimer’s disease (ad). *Frontiers in Computational*  
657 *Neuroscience*, 12:60, 2018.

- 658 [36] Pouya Bashivan, Irina Rish, Mohammed Yeasin, and Noel Codella. Learning  
659 representations from eeg with deep recurrent-convolutional neural networks. *arXiv*  
660 *preprint arXiv:1511.06448*, 2015.
- 661 [37] Pilar Garcés, María Carmen Martín-Buro, and Fernando Maestú. Quantifying  
662 the test-retest reliability of magnetoencephalography resting-state functional  
663 connectivity. *Brain connectivity*, 6(6):448–460, 2016.
- 664 [38] Kristina T Legget, Allison K Hild, Sarah E Steinmetz, Steven T Simon, and  
665 Donald C Rojas. Meg and eeg demonstrate similar test-retest reliability of the  
666 40 hz auditory steady-state response. *International Journal of Psychophysiology*,  
667 114:16–23, 2017.
- 668 [39] María Carmen Martín-Buro, Pilar Garcés, and Fernando Maestú. Test-retest  
669 reliability of resting-state magnetoencephalography power in sensor and source  
670 space. *Human brain mapping*, 37(1):179–190, 2016.
- 671 [40] Corinna Cortes, Giulia De Salvo, and Mehryar Mohri. Boosting with abstention. In  
672 *Proceedings of the 30th International Conference on Neural Information Processing*  
673 *Systems*, pages 1668–1676, 2016.
- 674 [41] Sunil Thulasidasan, Tanmoy Bhattacharya, Jeffrey Bilmes, Gopinath Chennupati,  
675 and Jamal Mohd-Yusof. Knows when it doesn’t know: Deep abstaining classifiers.  
676 2018.
- 677 [42] Manasij Venkatesh, Joseph Jaja, and Luiz Pessoa. Comparing functional connec-  
678 tivity matrices: A geometry-aware approach applied to participant identification.  
679 *NeuroImage*, 207:116398, 2020.
- 680 [43] Brian Kulis et al. Metric learning: A survey. *Foundations and trends in machine*  
681 *learning*, 5(4):287–364, 2012.
- 682 [44] Qiang Yang, Yang Liu, Tianjian Chen, and Yongxin Tong. Federated machine  
683 learning: Concept and applications. *ACM Transactions on Intelligent Systems*  
684 *and Technology (TIST)*, 10(2):1–19, 2019.
- 685 [45] Yegang Hu, Chunli Yin, Jicong Zhang, and Yuping Wang. Partial least square  
686 aided beamforming algorithm in magnetoencephalography source imaging. *Fron-*  
687 *tiers in neuroscience*, 12:616, 2018.

- 688 [46] Eric Jones, Travis Oliphant, and Pearu Peterson. Scipy: Open source scientific  
689 tools for python. 2001.
- 690 [47] Samu Taulu and Matti Kajola. Presentation of electromagnetic multichannel data:  
691 the signal space separation method. *Journal of Applied Physics*, 97(12):124905,  
692 2005.
- 693 [48] Samu Taulu and Juha Simola. Spatiotemporal signal space separation method  
694 for rejecting nearby interference in meg measurements. *Physics in Medicine &  
695 Biology*, 51(7):1759, 2006.
- 696 [49] Mikko A Uusitalo and Risto J Ilmoniemi. Signal-space projection method for  
697 separating meg or eeg into components. *Medical and Biological Engineering and  
698 Computing*, 35(2):135–140, 1997.

## 699 Supplementary Material

### 700 A. Data preprocessing

701 Here we list the preprocessing steps applied to the four types of datasets: Harry Potter  
702 (HP), SEN, FST, and Human Connectome Project (HCP). A summary is listed in  
703 table 1. For all datasets, we used an order 8 Chebyshev type I anti-aliasing filter  
704 in Python Scipy package[46] for downsampling. For any within-session identification  
705 task, data was z-scored within its corresponding type of dataset (target vs source).  
706 Some steps of preprocessing were performed using the python MNE package [31].

707 1- **HP/SEN**: The 306-channel Elekta Neuromag system was used for the  
708 recording. Source-space separation (SSS) along with Maxwell filtering and their  
709 temporal extension (tSSS) [47, 48] were used for bad channel correction, head  
710 position correction, and electromagnetic artifacts removal. Empty room artifacts  
711 were removed.  $1 \sim 150$  Hz bandpass filter and 60 & 120 Hz notch filter were  
712 used to remove line noise. Heartbeats and eyeblinks artifacts were removed with  
713 signal-space projection (SSP) [49]. The data was downsampled to 200 Hz and  
714 z-scored by channel within each individual and session.

715 2- **FST** (preprocessing pipeline was included in the source code): The 306-  
716 channel Elekta Neuromag system was used for the recording. Source-space separa-  
717 tion (SSS) along with Maxwell filtering and their temporal extension (tSSS) were  
718 used for bad channel correction and electromagnetic artifacts removal. Empty room  
719 artifacts were removed. We didn't perform head position correction since there  
720 was no head position data.  $1 \sim 150$  Hz Bandpass filter and 60 & 120 Hz Notch  
721 filter were used to remove line noise. Heartbeats and eyeblinks artifacts were also  
722 removed with SSP. The data was downsampled to 200 Hz and z-scored by channel  
723 within each individual and session.

724 3-**HCP**: Both resting and WM datasets were already preprocessed and down-  
725 loaded from the HCP database<sup>3</sup>. The details of the preprocessing pipeline can  
726 be found at [https://www.humanconnectome.org/storage/app/media/docume](https://www.humanconnectome.org/storage/app/media/documentation/s1200/HCP_S1200_Release_Reference_Manual.pdf)  
727 [ntation/s1200/HCP\\_S1200\\_Release\\_Reference\\_Manual.pdf](https://www.humanconnectome.org/storage/app/media/documentation/s1200/HCP_S1200_Release_Reference_Manual.pdf). MAGNES 3600  
728 (4D Neuroimaging, San Diego, CA) system was used for the recording. For WM  
729 data, we looked at the TIM partition which corresponds to  $-1.5 \sim 2.5$  s relative to

---

<sup>3</sup><https://www.humanconnectome.org/study/hcp-young-adult>



730 the onset of the image. For both resting and WM data, the sampling frequency  
 731 of the preprocessed data is 508.63 Hz, and 2 s of data were selected from each  
 732 trial. This corresponds to the whole 1018 time points in the resting data and  
 733 [763 : 1780]-th time point for the WM data (corresponding to 0 ~ 2 s relative to  
 734 the onset of the image). The 2 s data was then downsampled to 101.73 Hz. Data  
 735 was z-scored by channel within each individual and each data type (resting and  
 736 WM). We looked at the 146 channels which were marked "good" among all the 77  
 737 overlapping individual between resting and WM.

Table 1: Summary of the preprocessing steps for HP, SEN, FST, and HCP data

| Steps                                      | HP/SEN                                | FST               | HCP                        |
|--------------------------------------------|---------------------------------------|-------------------|----------------------------|
| bad data                                   | corrected                             | corrected         | removed                    |
| head position                              | corrected                             | not corrected     | not corrected <sup>4</sup> |
| electromagnetic artifacts                  | removed using SSS                     | removed using SSS | removed with bad data      |
| empty room artifacts                       | removed                               | removed           | removed <sup>5</sup>       |
| band filtering                             | 1 ~ 150 Hz                            | 1 ~ 150 Hz        | 1.3 ~ 150 Hz               |
| notch filtering                            | 60 & 120 Hz                           | 60 & 120 Hz       | 59 – 61&119 – 121 Hz       |
| ECG (heartbeat) artifacts                  | removed with SSP                      | removed with SSP  | removed with ICA           |
| EOG (eyeblink) artifacts                   | removed with SSP                      | removed with SSP  | removed with ICA           |
| downsampling                               | 200 Hz                                | 200 Hz            | 101.73 Hz                  |
| z-scoring                                  | by channel within individual, session | same              | same                       |
| shape of a trial<br>[channels, timepoints] | [102, 100]                            | [102, 100]        | [146, 204]                 |

<sup>4</sup>No continuous recording of head position was available in HCP data

<sup>5</sup>page 68 of [https://www.humanconnectome.org/storage/app/media/documentation/s1200/HCP\\_S1200\\_Release\\_Reference\\_Manual.pdf](https://www.humanconnectome.org/storage/app/media/documentation/s1200/HCP_S1200_Release_Reference_Manual.pdf)

738 B. Sensor layout for FST, SEN, and HP data

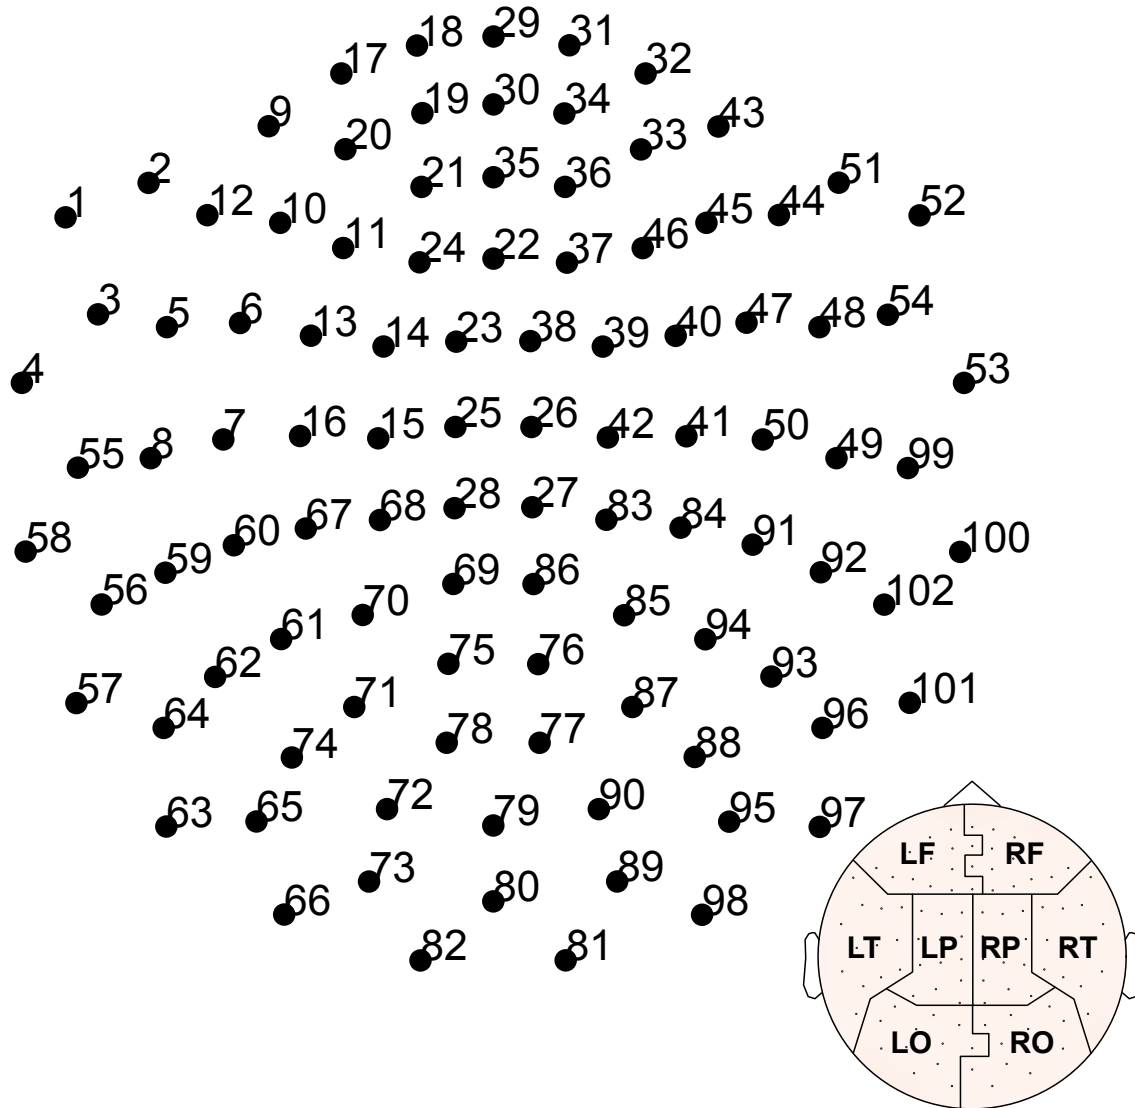

Figure 8: Layout of the sensors for FST, HP, and SEN data (306-channel Elekta Neuromag system). Channel numbers are consistent with the channel index in Figure 11. Inset is the partitioning of the sensors same as Figure 6 (a) of the main text.

739 C. Identification accuracy vs. sample size for Harry  
740 Potter data

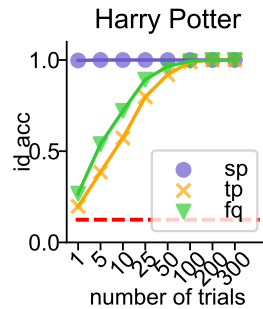

Figure 9: **Identification accuracy of sp, tp, and fq on the Harry Potter data.** Each dot was averaged across individuals (8) and identification runs (100). Error bars are the SE across individuals and identification runs and are invisible due to small values. Each trial is 0.5s in length. The trends for **tp** and **fq** are similar to that of the cross-session data (SEN and FST). **sp** requires as few as one trial to achieve a perfect accuracy. This indicates strong spatial patterns in the HP data which are specific to each individual. This is expected since HP does not have more than one session, and the identification accuracy for **sp** may be lower if there are multiple sessions in HP data, similar to what we have observed on FST and SEN data.

741 **D. Identification accuracy with components of brainprints for**  
 742 **FST data**

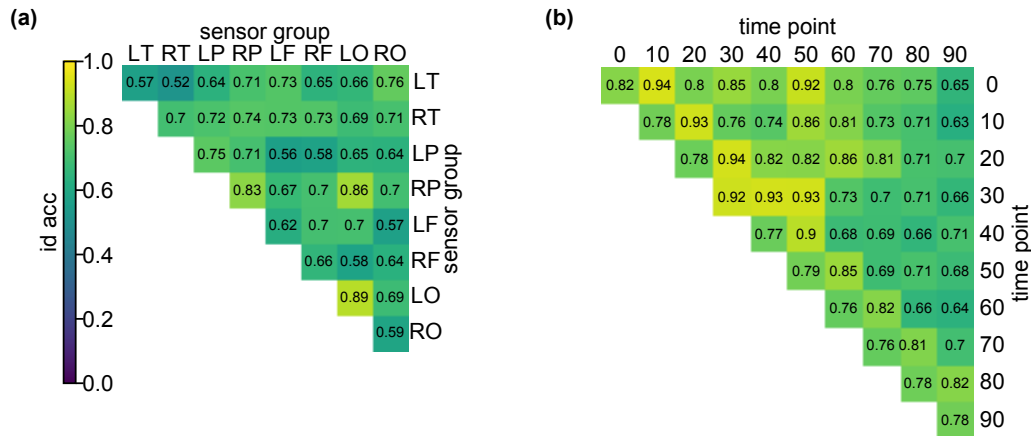

Figure 10: **Identification accuracy with sub features for a: sp and b: tp in FST data (similar to Figure 6 in the main text).** For both FST and SEN, the within-LO and LO-RP correlations yield high identification accuracy. Similarly, for both FST and SEN, the super-diagonal and the correlations between the fourth and fifth 0.05 s yield high accuracy. The consistency of the results on the two datasets suggest that our conclusions in Section 4.2 are not due to experiment-specific artifacts.

## 743 **E. Example brainprints of FST data**

744 *Note:* we have emphasized the importance of preserving individual privacy throughout  
745 the paper. Since the FST dataset is published online and our way of computing  
746 brainprints (as either discussed in the main text or the source code) will eventually be  
747 publicly available, showing individual brainprints will not reveal new information about  
748 the individuals. Hence we decided to include the following examples of brainprints to  
749 show more intuition behind the high identification accuracy of the three brainprints.  
750 (.Figures in the next page).

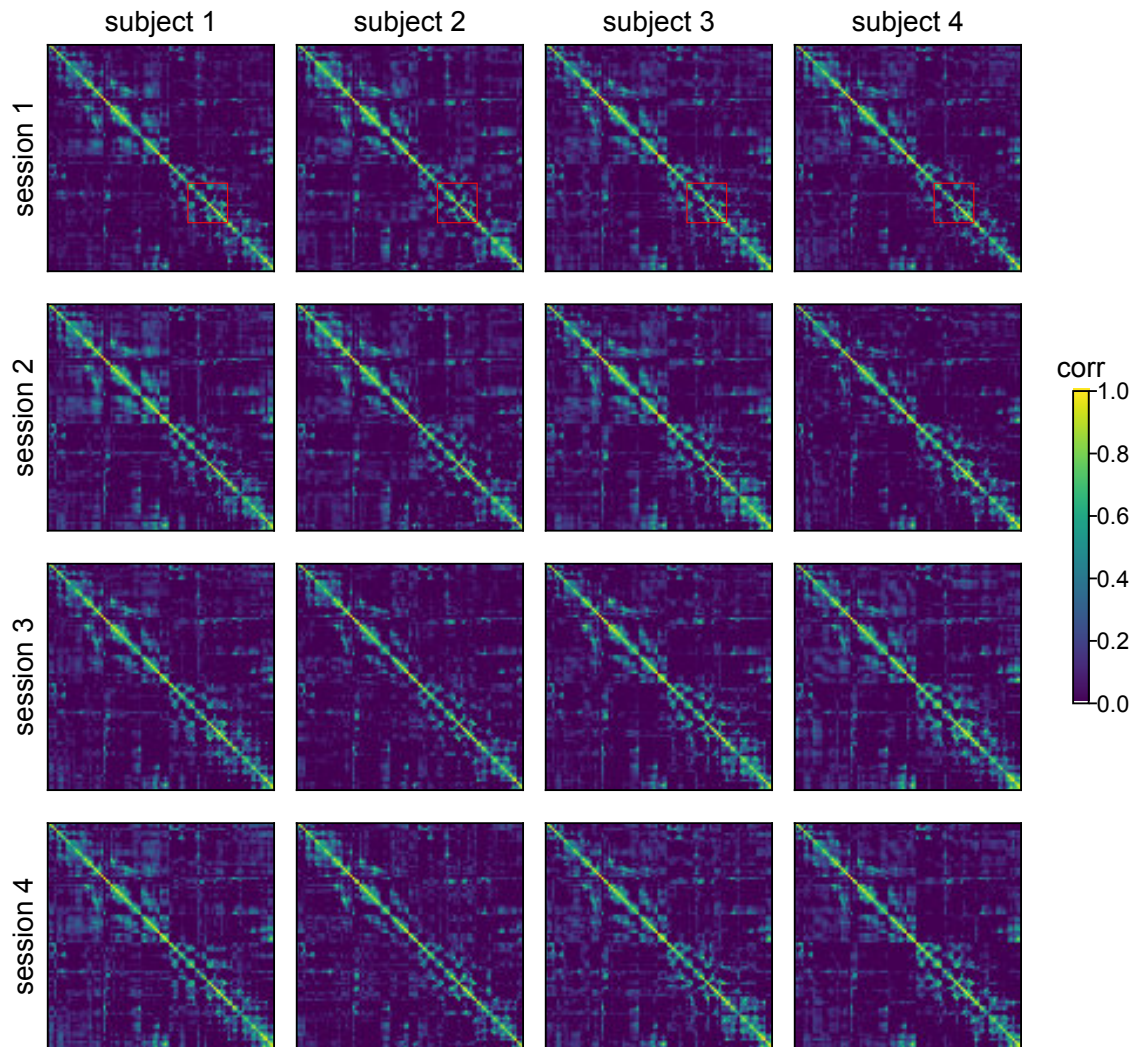

Figure 11: **Example sp (spatial connectivity) of FST data.** Each heatmap represents a  $102 \times 102$  spatial correlation matrix. For better illustration we clipped the correlation into  $[0,1]$ . The general patterns of the correlation matrices are similar to each other. Some subsets of the heatmap, for example, the bottom-right corner, the top-left corner, and the red rectangle areas are more consistent within a individual and different between individuals. This suggests that only the interactions among a subset of sensors are individual-specific. The red rectangle areas, in particular, roughly correspond to the correlations within the left occipital (LO) lobe which yields the highest identification accuracy on both FST and SEN data (see Figure 6(a) and Figure 10). More complicated comparison algorithms may be proposed to focus on these specific subsets to improve the identification accuracy.

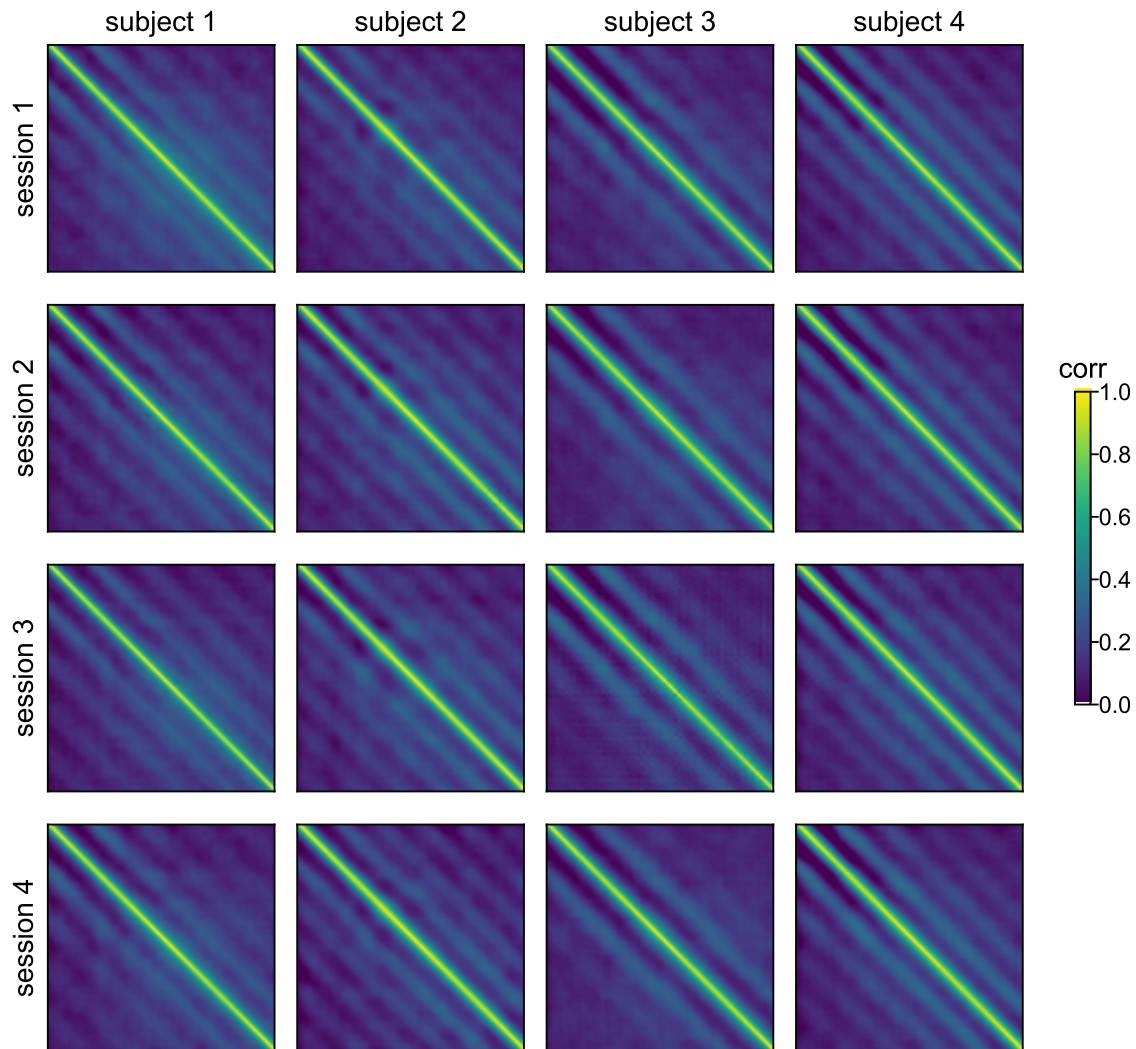

Figure 12: **Example tp (temporal connectivity) of FST data.** Each heatmap represents a  $100 \times 100$  temporal correlation matrix. For better illustration we clipped the correlation into  $[0,1]$ . The banded structure of the matrices are preserved for the same individual across sessions, and are different between individuals in terms of the number of bands and the relative locations of the bands. The banded structure indicates that there are stronger correlations of the signal with itself at certain lags. In other words, looking at the auto-correlation of the signal or even cross-correlation between different channels may reveal interesting results about the temporal dynamics of the brain activities. The individual-specific band structures also confirm the findings in Figure 6 (b) that correlations of the signal with itself at certain lags are best able to identify individuals.

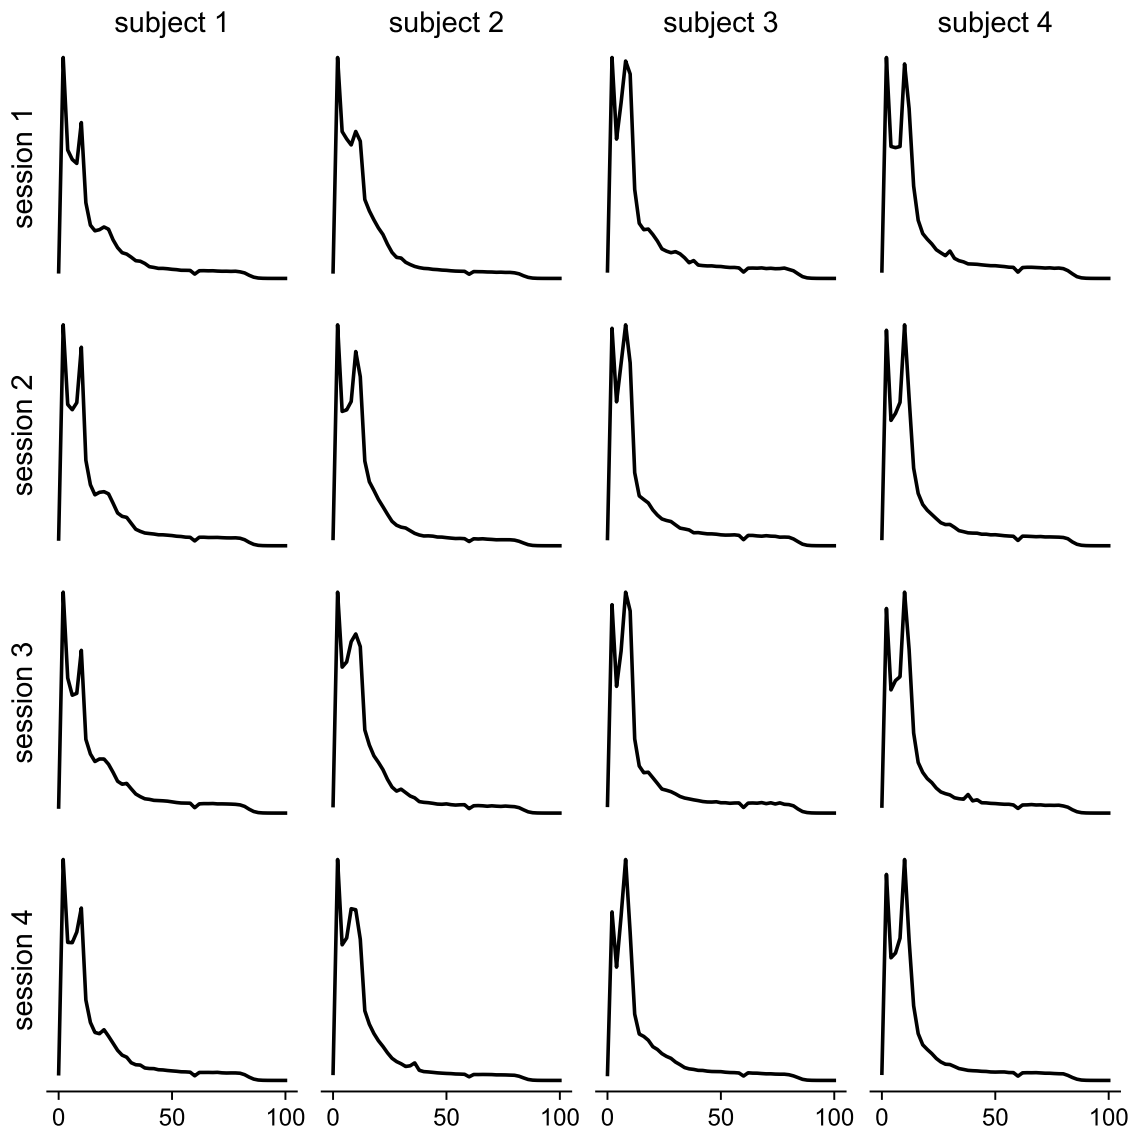

Figure 13: **Example fq (frequency) of FST data.** Each plot represents spectrum (averaged across channels) vs. frequencies (Hz), where the range of frequencies is [0, 100] with a 2 Hz increment. For all individuals, there are two peaks in the power spectrum. The two peaks correspond to around 5 and 10 Hz. The relative height of the two peaks as well as the shape of the curve near the two peaks are consistently unique to an individual across sessions and different across individuals. There are also small peaks near 20 Hz for some individuals. These frequencies with higher amplitudes seem to align with the results shown in Figure 6 (c) where the frequency band near 10 Hz yields the highest identification accuracy. Hence the components of **fq** associated with more stimuli-driven activity or larger signal-to-noise ratio seem to yield better results.



## 751 F. Statistical significance of the results

752 The identification and rank accuracy were averaged across subjects, identification runs,  
753 and session pairs. The reported accuracies, being so large, are both statistically and  
754 practically significant, and are nearly impossible to attribute to random chance, but  
755 accurately quantifying the uncertainty is challenging in our setup. Since featurization  
756 for each session of each subject was done before the matching, there is some weak  
757 dependence on the accuracy between subjects, session, and identification runs. This  
758 dependence makes it hard to analytically obtain a p-value for the accuracy. One  
759 numerical alternative is to permute the original recording within each session across  
760 subjects before performing matching, but this is computationally expensive as it  
761 involves loading and computing large chunks of data 1000s of times. Hence we provide  
762 below a (natural, but approximate) permutation-based method for a p-value to test  
763 the null that the match is a random guess.

764 Let  $\mathbf{y}^i$  denote the true labels of session  $i$ . Note that  $\mathbf{y}^i = [1, 2, 3, 4]^T$  for any session.  
765 The permutation test is performed as follows:

---

**Algorithm 1:** Null distribution for the identification/rank accuracy

---

```
 $N_{null} \leftarrow \{\}$ : samples for the null distribution  
 $T$ : number of permutation runs  
for  $t \leftarrow 1$  to  $T$  do  
     $\mathbf{y}_t^i \leftarrow \text{permute}(\mathbf{y}^i), \forall i$   
    Re-compute the average accuracy,  $a_t$ , using  $\{\mathbf{y}_t^i\}_i$   
     $N_{null} = N_{null} \cup \{a_t\}$   
end  
return  $N_{null}$ 
```

---

766 To calculate the p-value, we simply compute  $p = \frac{1}{T} \sum_{t=1}^T \mathbb{1}_{a \leq a_t}$ , where  $a$  is the  
767 observed average accuracy of a feature across subjects, sessions, and identification runs.  
768 Algorithm 1 permutes the labels for each session independently but the permutation  
769 remains unchanged for the same source-target pair across identification runs. We  
770 summarize the p-values for the identification and rank accuracy of three features  
771 on the FST, SEN, and HCP data using  $T = 4999$  permutation runs. For all the  
772 p-values, since we have not encountered any  $a_t$  that exceeds the accuracy number, their  
773 values are simply  $\frac{1}{T+1} = 0.0002$ . We emphasize that even though these p-values are  
774 technically only approximate due to some weak dependence, the fact that we did not

775 see a single permutation which achieved a higher accuracy than ours should convince  
776 even rigorous skeptics that it is nearly impossible to explain away our accuracies to  
777 chance.

Table 2: Statistical significance for the accuracy numbers

| <b>Data</b> | <b>Feature</b> | <b>id acc</b> | <b>p-val: id</b> | <b>rank acc</b> | <b>p-val: rank</b> |
|-------------|----------------|---------------|------------------|-----------------|--------------------|
| FST         | <b>sp</b>      | 0.816         | 0.0002           | 0.936           | 0.0002             |
| FST         | <b>tp</b>      | 0.978         | 0.0002           | 0.994           | 0.0002             |
| FST         | <b>fq</b>      | 0.962         | 0.0002           | 0.991           | 0.0002             |
| SEN         | <b>sp</b>      | 0.719         | 0.0002           | 0.888           | 0.0002             |
| SEN         | <b>tp</b>      | 0.983         | 0.0002           | 0.996           | 0.0002             |
| SEN         | <b>fq</b>      | 0.991         | 0.0002           | 0.998           | 0.0002             |
| HCP         | <b>sp</b>      | 0.771         | 0.0002           | 0.974           | 0.0002             |
| HCP         | <b>tp</b>      | 0.159         | 0.0002           | 0.819           | 0.0002             |
| HCP         | <b>fq</b>      | 0.229         | 0.0002           | 0.845           | 0.0002             |
